# Supplementary material for: Escape from X Inactivation Varies in Mouse Tissues
Source: PLoS Genet. 2015 Mar 18;11(3):e1005079. doi: 10.1371/journal.pgen.1005079 (PMC4364777; doi:10.1371/journal.pgen.1005079)
Supplement: S1 Table — (XLSX) [file pgen.1005079.s005.xlsx]

## Sheet: S1
Supplemental Table S1. Summary of X-linked genes examined by allelic RNA-seq expression analysis in mouse tissues and Patski cells
Tissue	Number of mapped readsa		Number of X-linked genes in expression categoriesb
	Replicate 1	Replicate 2	Not transcribedc	Not accessibled	Accessible and transcribed	Escape status
						Escapee	Variable escapef	Inactivatedg
Brain	104M	36M	563	30	427	14 (3%)	13 (3%)	400
Spleen	89M	33M	625	36	359	17 (5%)	9 (3%)	333
Ovary	78M	N.A.	547	36	437	33 (7%)	N.A.	404
Patski	34M	27M	684	24	312	66 (21%)	43 (14%)	203
