# Supplementary material for: Escape from X Inactivation Varies in Mouse Tissues
Source: PLoS Genet. 2015 Mar 18;11(3):e1005079. doi: 10.1371/journal.pgen.1005079 (PMC4364777; doi:10.1371/journal.pgen.1005079)
Supplement: S3 Table — (XLSX) [file pgen.1005079.s007.xlsx]

## Sheet: S3
Supplemental Table S3. Escape genes in spleen using ≥2 Xi-SRPM cutoff
Gene	Location	Replicate 1 BL6 reads	Replicate 1 sp reads	p-low	p-high	Xa-SRPM	Xi-SRPM	SNP #	BL6 covered SNPs	sp covered SNPs	Replicate 2 BL6 reads	Replicate 2 sp reads	p-low	p-high	Xa-SRPM	Xi-SRPM	SNP #	BL6 covered SNPs	sp covered SNPs
Cybb	chrX:9012377-9046450	6977	279	0.0335828	0.0455328	785.326	31.4041	73	72	56	1976	45	0.0143568	0.0319098	607.276	13.8297	73	71	31
Ddx3x	chrX:12858147-12871109	1910	627	0.230281	0.275056	214.988	70.5747	16	16	15	701	264	0.243768	0.318999	215.435	81.134	16	16	15
Kdm6a	chrX:17739792-17856484	320	167	0.293603	0.405426	36.019	18.7974	10	10	9	134	99	0.350351	0.518107	41.1817	30.4253	10	10	9
Cfp	chrX:20502660-20508650	1930	125	0.0485949	0.0764697	217.24	14.0699	10	10	10	662	34	0.0288848	0.0724897	203.45	10.4491	10	10	8
Utp14a	chrX:45610110-45635626	1039.77	40	0.0228917	0.0533227	117.036	4.50237	18	18	14	394.876	18.4533	0.0192046	0.0734359	121.356	5.67117	18	18	11
Firre*	chrX:47908920-47988435	774	36	0.0265465	0.0648657	87.1209	4.05214	1356	212	42	197	24	0.0567515	0.167915	60.5432	7.37582	1356	118	30
Bgn	chrX:70728973-70741275	2890	45	0.00977221	0.0217955	325.296	5.06517	14	14	13	1103	17	0.00599776	0.0255472	338.98	5.22454	14	14	9
5430427O19Rik	chrX:83115611-83136838	954	58	0.0396008	0.078238	107.382	6.52844	68	40	19	162	7	0.00201648	0.0838659	49.7868	2.15128	68	34	4
Eif2s3x	chrX:91434047-91457990	4468	1227	0.206216	0.234753	502	340	32	32	30	2222	640	0.209991	0.250983	673	193	32	32	30
Vsig4	chrX:93442541-93488777	30	19	0.213385	0.574287	3.37678	2.13863	17	7	11	8	8	0.183837	0.827642	2.45861	2.45861	17	7	6
Xist	chrX:100655711-100678572	57.5314	21964	0.996603	0.998324	6.4757	2472.25	150	20	142	28.34	10384	0.996118	0.998647	8.70961	3191.27	150	24	140
Ftx	chrX:100756248-100819093	942	26	0.0138734	0.0414016	106.031	2.92654	43	28	5	220	19	0.0357541	0.12891	67.6117	5.83919	43	19	0
5530601H04Rik	chrX:102236192-102265463	333	67	0.12255	0.220634	37.4823	7.54148	53	43	25	120	23	0.0846967	0.247199	36.8791	7.06849	53	40	17
Pbdc1	chrX:102275113-102280525	254	75	0.172568	0.293632	28.5901	8.44195	22	13	8	101	19	0.0751776	0.251482	31.0399	5.83919	22	14	7
5730416F02Rik	chrX:106196823-106197635	29	72	0.604006	0.832981	3.26422	8.10427	11	1	2	12	11	0.216549	0.753902	3.68791	3.38058	11	1	1
Kdm5c	chrX:148667772-148708897	762	349	0.284236	0.356755	85.7702	39.2832	35	32	30	502	155	0.199443	0.286537	154.278	47.6355	35	34	28
Tmsb4x	chrX:163645025-163647150	25571	67	0.00184568	0.00353727	2878.25	7.54148	2	2	1	1787	8	0.000423404	0.00884378	549.191	2.45861	2	2	1
