# Supplementary material for: Escape from X Inactivation Varies in Mouse Tissues
Source: PLoS Genet. 2015 Mar 18;11(3):e1005079. doi: 10.1371/journal.pgen.1005079 (PMC4364777; doi:10.1371/journal.pgen.1005079)
Supplement: S4 Table — (XLSX) [file pgen.1005079.s008.xlsx]

## Sheet: S4
Supplemental Table S4. Escape genes in ovary using ≥2 Xi-SRPM cutoff
Gene	Location	BL6 reads	sp reads	p-low	p-high	Xa-SRPM	Xi-SRPM	SNP #	BL6 covered SNPs	sp covered SNPs
AU022751	chrX:5658335-5660538	86	84	0.397728	0.595288	10.996	10.7403	27	23	23
Bmp15	chrX:5891223-5897841	186	195	0.448308	0.580199	23.7821	24.9328	35	34	34
Cybb	chrX:9012377-9046450	241	16	0.0236633	0.101987	30.8144	2.04577	73	62	14
1810030O07Rik	chrX:12232009-12250672	1028	20	0.00827893	0.0302609	131.441	2.55721	33	32	15
Usp9x	chrX:12648623-12750453	1072	22	0.00926874	0.0313423	137.066	2.81293	35	28	14
Ddx3x	chrX:12858147-12871109	1690	518	0.213036	0.259739	216.084	66.2317	16	16	15
Kdm6a	chrX:17739792-17856484	221	99	0.244651	0.37827	28.2572	12.6582	10	10	9
Uba1	chrX:20235546-20260305	2656	21	0.003487	0.0123575	339.598	2.68507	21	21	15
Lamp2	chrX:35758240-35809632	5546	22	0.00180344	0.00617747	709.114	2.81293	18	18	7
Utp14a	chrX:45610110-45635626	365.599	35	0.0515133	0.124792	46.7457	4.47512	18	18	14
Firre*	chrX:47908920-47988435	3873	37	0.00552921	0.0135838	495.204	4.73084	1356	344	30
Mmgt1	chrX:53838688-53851096	1312	31	0.0126516	0.0339623	167.753	3.96368	37	37	15
Idh3g	chrX:71024301-71032236	977	25	0.0123792	0.0380042	124.92	3.19651	5	5	4
Flna	chrX:71468799-71491873	6716	37	0.00319681	0.00787015	858.711	4.73084	32	32	16
AU015836	chrX:91213994-91220809	46	33	0.276784	0.563096	5.88158	4.2194	23	19	21
Eif2s3x	chrX:91434047-91457990	2960	1036	0.243229	0.279114	379	133	32	32	30
Kif4	chrX:97821403-97922610	263	19	0.029207	0.106771	33.6273	2.42935	40	38	20
Xist	chrX:100655711-100678572	55.8694	14464.9	0.99488	0.997501	7.14349	1849.49	150	38	140
Ftx	chrX:100756248-100819093	264	34	0.0672774	0.162884	33.7552	4.34726	43	25	5
Slc16a2	chrX:100892752-101017327	297	20	0.0281892	0.0991503	37.9746	2.55721	22	20	1
Rlim	chrX:101152505-101176623	1636	18	0.00435456	0.0176253	209.18	2.30149	60	56	13
5530601H04Rik	chrX:102236192-102265463	184	82	0.237136	0.38355	23.5263	10.4846	53	40	21
Pbdc1	chrX:102275113-102280525	204	78	0.209627	0.34746	26.0835	9.97312	22	20	11
Sh3bgrl	chrX:106290745-106357806	6625	21	0.00140037	0.00498215	847.076	2.68507	38	38	14
Fam199x	chrX:133584132-133617040	443	17	0.0144405	0.0601737	56.6422	2.17363	73	68	14
Rnf128	chrX:136097878-136207684	2049	67	0.0220723	0.0418658	261.986	8.56665	25	22	19
Tmem164	chrX:139115942-139278037	1794	21	0.00515529	0.0182131	229.382	2.68507	57	57	18
Alg13	chrX:140752508-140808991	224	19	0.0341548	0.123625	28.6408	2.42935	12	11	6
Tmem29	chrX:146832315-146893693	138	16	0.040952	0.168619	17.6448	2.04577	11	4	2
Huwe1	chrX:148237824-148369961	2042	22	0.00488485	0.0166432	261.091	2.81293	43	43	11
Kdm5c	chrX:148667772-148708897	711	253	0.227693	0.301038	90.9088	32.3487	35	35	31
Pdha1	chrX:156560150-156576268	5672.92	15.8245	0.000992854	0.004626	725.343	2.02333	24	24	13
Car5b	chrX:160414753-160465942	2198	79	0.0250581	0.044999	281.037	10.101	50	39	11
